# Supplementary material for: Investigating cold based summit glaciers through direct access to basal ice: A case study constraining the maximum age of Chli Titlis glacier, Switzerland
Source: Copernicus journal article supplement (doi:10.5194/tc-2017-171), 2017-09-28
Supplement: Supplementary file [file tc-2017-171-AC2-supplement.pdf]

1 **"Investigating cold based summit glaciers through direct access to basal ice: A case**  
2 **study constraining the maximum age of Chli Titlis glacier, Switzerland" by Pascal**  
3 **Bohleber et al.**

4 - Response to reviews -  
5

6 ***Please note:***

- 7 • *Author's responses to the referee's comments are in blue*
- 8 • *Changes in the corresponding revised manuscript are highlighted in red*
- 9 • *All line numbers in "Changes to manuscript" refer to the new revised version*
- 10 • *All new references can be found in the new manuscript*

11  
12  
13 **Response to referee #2, R. Waller**

14 **General comments**

15  
16 I agree with the first referee that this paper presents a series of interesting findings  
17 from a summit glacier in Switzerland that suggest that a cold-based thermal regime  
18 has been persistent at this site resulting in the preservation of the basal ice for c.  
19 5,000 years. The paper is therefore clearly appropriate for publication within The  
20 Cryosphere although I think there are areas that would benefit from further work.

21  
22 *We thank the referee for his comments and in particular for bringing our*  
23 *attention to the importance of a detailed description of the ice facies. Although*  
24 *the authors did not have a detailed background in geology we have consulted*  
25 *the respective literature and our visual analysis of the stratigraphy. Based on*  
26 *this further investigation we have added to the revised manuscript, in*  
27 *particular Table 2 giving an overview on the macroscopic ice characteristics.*

28  
29 **Areas for improvement**

30 Agree firstly with the comments of the first referee - particularly the need to include  
31 a map of the study site that indicates the location and setting of the glacier and the  
32 tunnel. The paper focuses on the examination of basal ice at the site but is unclear  
33 whether the use of the term "basal" is used simply to refer to its position at the base  
34 of the glacier or in its glaciological sense (ice which is produced at and interacts  
35 with the bed; e.g. Knight, 1997). Either way, I would recommend that the authors  
36 consult some of the relevant literature to inform their description and  
37 interpretation of the ice examined in this study. On a related note, I would like to see  
38 a more detailed description of the ice facies observed within the tunnel within  
39 section 3 to support the more detailed ice petrography reported in section 3.4 (see  
40 for example Hubbard & Sharp, 1995). The impact of the work would be enhanced if  
41 greater emphasis was given to the broader context of the work and its key findings

42 within both sections 1 and 5. What is the wider palaeoclimatological and  
43 palaeoglaciological significance of the preservation of ice 5,000 years at this  
44 altitude? Section 4.5 in particular would benefit from a clearer structure to help  
45 emphasise and explain the key points.

46  
47 We appreciate these valuable suggestions and have tried to integrate them in  
48 the revised manuscript. Specifically, we have compiled a new figure 1 showing  
49 a location map. We have also consulted the suggested literature regarding ice  
50 facies, and now include these references in a more in-depth discussion of this  
51 point. We have added a respective table (Table 2) with an overview of the  
52 main stratigraphic features at each sampling site. We also tried to add more  
53 discussion regarding the wider paleoclimatological and paleoglaciological  
54 significance of our results. At the same time we would like to point out the  
55 pilot character of this work and believe that the full paleoclimatic implications  
56 of constraining the maximum age of these summit glaciers will fully unfold  
57 after combining results from several sites and comparing them with other  
58 proxy evidence in more detail. This is already part of our ongoing  
59 investigation.

60  
61 As an additional comment, we now realize that the use of the word "basal" in  
62 the original version of the manuscript was not sufficiently clear and may have  
63 caused some confusion. We intended to refer to the lowermost, hence  
64 potentially oldest sections of the glacier. While this includes the "basal layer"  
65 in a strict glaciological sense, we actually referred to a much larger section of  
66 ice above the glacier base, i.e. that becomes accessible at Chli Titlis through the  
67 ice cave.

68 We thank the referee for pointing out this ambiguity and have clarified the  
69 manuscript accordingly.

70  
71 **Changes to manuscript:** P4, L4-5: Clarified the use of the term "basal" vs  
72 "lowermost".

73  
74 Minor comments

75  
76 P1 - Abstract - Highlight the primary research question this research  
77 is aiming to address. Feel this will help to establish its wider context and  
78 significance.

79  
80 Thank you for the suggestion. We decided to reword part of the abstract to  
81 point out our primary research questions more clearly.

82  
83 **Changes to manuscript:** P1, L6ff: Reworded abstract.

84  
85 P1 - L8/9 - Explain what is meant my "standard glaciological tools".

86

87 We have removed this part in the reworded abstract version and feel that our  
88 approach is presented in a more explicit way now, including specifically  
89 stating what tools were used in the study.  
90

91 P1 - L9 - Clarify what is meant by the use of the term “sophisticated”.

92  
93 We have reworded this part as "state-of-the-art micro-radiocarbon analysis".  
94 The primary challenge compared to conventional radiocarbon dating methods  
95 is that glacier ice comprises extremely low carbon concentrations, requiring a  
96 great deal of sophistication in sample preparation and analysis.  
97

98 **Changes to manuscript:** P2, L22ff. We have clarified this point in the Introduction  
99 and also include a new reference to the recent paper by Hoffmann et al. (2017),  
100 describing the employed technique in detail.  
101

102 P1 - Section 1 - Explain more explicitly why cold-based thermal conditions are of  
103 such importance - i.e. warm-based conditions and basal melting lead to the loss of  
104 the oldest ice - impossible therefore to date onset of most recent phase of glaciation.  
105

106 Thank you for the suggestion. We have added a respective statement to clarify.  
107

108 **Changes to manuscript:** P2, L6-8. Statement added.  
109

110 P1 - L19/20 - Provide the approximate altitudinal ranges for “uppermost summit  
111 ranges” and “lower altitudes”.

112  
113 Changed accordingly.  
114

115 P2 - L4 - Basal temperatures persistently below the pressure melting point?

116  
117 Yes, thank you- changed accordingly.  
118

119 P2 - L5 - Clarify what is meant by “glacier buried tree parts” - re-word.

120  
121 Changed accordingly.  
122

123 **Changes to manuscript:** P2, L12-13: " trees formely buried by glacier advances"  
124

125 P2 - L8/9 - Give greater emphasis to this key broader aim of the research (e.g. could  
126 be presented at the start of the final paragraph in this section) and provide a little  
127 more explanation on how the paper will help to realise this aim.  
128

129 We appreciate the suggestion and, in an attempt to give greater emphasis on  
130 the broader context of this research, have restructured the middle part of the  
131 introduction.  
132

133 **Changes to manuscript:** P2, L5-29. Restructured part of Introduction.

134

135 P3 - L6 - "as well at around..."

136

137 What we intend to say here is " report sub-zero bedrock temperature *and*  
138 temperatures around -1 deg C..."

139

140 **Changes to manuscript:** P4, L18-19. Changed statement.

141

142 P3 - L8 - What attribute provides the layering? Variations in bubble content,  
143 sediment concentration? As mentioned earlier, providing a more detailed  
144 description of the characteristics of the basal ice here and within section 4 would be  
145 helpful.

146

147 At this instance we are referring to the earlier study by Haeberli et al. (2004).  
148 The authors do not mention any details regarding the nature of the layering.  
149 However, following the referee's suggestion we have added more detail  
150 regarding the stratigraphy of the three sampling sites. We have included this  
151 description in section 3.4 (see comment below), and have also added a new  
152 table (Table 2) summarizing the main characteristics. We then refer to these  
153 characteristics again in section 4.

154

155 **Changes to manuscript:** P7, L1-11. Included description of visual stratigraphy in  
156 section 3.4.

157

158 P3 - L25 - Reword from "third spot" to "third profile".

159

160 Changed accordingly.

161

162 P3 - L28/29 - Use of the term "clear" here needs further clarification. Again -  
163 highlights need to include a section (maybe initially in section 2) that provides a  
164 more detailed description of the basal ice facies observed and clarification of the  
165 significance of the use of the term "basal".

166

167 We clarified that "clear" here refers to being entirely bubble-free. We have  
168 included a full description of the visual stratigraphy in section 3.4.

169

170 **Changes to manuscript:** P7, L1-11. Added full description of the visual stratigraphy  
171 to section 3.4.

172

173 P4 - Figure 1 - Include scale in Figure 1A. P4 - L4 - "20cm vertical intervals"

174

175 The original sketch in Figure 1A was not to scale. However, we have added a  
176 new Figure 1 showing the glacier site (an a zoom-in on the tunnel location) as  
177 orthophotos, thus including GPS coordinates (Swiss grid) for scale.

178

179 **Changes to manuscript:** Added new Figure 1 with orthophotos.  
180  
181 P5 - Section 3.2 - Where the stable isotope measurements taken from all the  
182 ice blocks? (Fig 2 suggests not)  
183  
184 Yes, in fact isotope data from block 2-5 in profile 2 is missing. The other  
185 profiles have continuous isotope measurements (at least one measurement  
186 per block). We have added information to the text to clarify this.  
187  
188 **Changes to manuscript:** P6, L2. Added Statement to clarify no data is available for  
189 block 2-5.  
190  
191 P5 - L3 - "The outermost 10 cm of each block exposed to the tunnel was removed"  
192  
193 Changed accordingly.  
194  
195 **Changes to manuscript:** P5, L7-8.  
196  
197 P5 - Section 3.3 - Which blocks were used for the radiocarbon dating?  
198  
199 We provide this information in Table 1, first column. We have slightly  
200 rearranged the text in the column to clarify this, now separating block number  
201 and combustion temperature.  
202  
203 **Changes to manuscript:** Table 1  
204  
205 P6 - Section 3.4 - Include a description of the macroscopic characteristics of the ice  
206 facies investigated here - ideally refer to an ice facies classification scheme.  
207 Explain why the clear ice facies was specifically targeted for analysis.  
208  
209 We appreciate the suggestion and have added a new paragraph to this section  
210 describing the macroscopic characteristics of the ice facies. We have also  
211 added a new table (Table 2) to summarize the characteristics following the  
212 classification scheme of Hubbard et al. (2009). The clear ice facies was not  
213 specifically targeted, but rather a result of the search for different basal ice  
214 characteristics, i.e. visual differences w.r.t profile 2.  
215  
216 **Changes to manuscript:**  
217 • P7, L1-11: Added new paragraph.  
218 • Added new Table 2.  
219  
220 P6 - Section 4.1- It's worth emphasising here that the measured temperatures are  
221 significantly lower than those previously recorded by Haeberli.  
222

223 Thank you, we added a respective remark to this section. We suspect this may  
224 be connected to the artificial cooling installed in recent years.

225  
226 **Changes to manuscript: P8, L14: Added statement.**

227  
228 P7 - L7 - Equilibration?

229  
230 Yes, referring to the time needed for the sensors to be in equilibrium with the  
231 ambient ice temperature.

232  
233 **Changes to manuscript: P8, L19: "limited time for establishing equilibrium".**

234  
235 P7 - Section 4.2 - Explain the significance of a replication of the basal isotope  
236 anomaly. Does this indicate that the basal ice formed from precipitation during  
237 colder climatic conditions?

238  
239 The significance of refinding the basal isotope anomaly lies in the fact that this  
240 supports the view of the basal ice not having undergone substantial changes  
241 over the last 25 years (i.e. since the anomaly was first described by Lorrain  
242 and Haeberli (1990)). We state this on page 9, Lines 11 ff. (revised  
243 manuscript). We also state that a full investigation of the origin of this anomaly  
244 is beyond the scope of this work. That said, as already discussed by Lorrain  
245 and Haeberli (1990), and also by Keck (2001) and Wagenbach et al. (2012), a  
246 pure atmospheric origin of this signal is very unlikely, with post-depositional  
247 processes probably contributing to this signature. We have added a more clear  
248 reference to this circumstance.

249  
250 **Changes to manuscript: P9, L8-9. Added statement.**

251  
252 P8- Figure 2 - Illustrate which samples have been obtained from the clear ice (cf.  
253 Figure1D/E).

254  
255 Changed accordingly. Used grey shading in what is now Figure 3.

256  
257 P8 - Again, a brief description of the ice facies and their key characteristics (e.g.  
258 debris content and bubble content) would help provide a context for the  
259 microstructural characteristics.

260  
261 As discussed above we have followed this valuable suggestion and included a  
262 facies description in section 3.4 and Table 2, to which we again refer to here,  
263 especially regarding the clear basal ice of profile 1.

264  
265 P9 - Figure 3 - Where have these results been obtained from? "Selected results"  
266 rather than "exemplary results".

267

268 Changed accordingly, we now provide this information in the caption of Figure  
269 4.

270  
271 P9 - Section 4.4 - Does progressive downwasting and thinning of the ice provide a  
272 potential explanation for the fall in temperature?  
273

274 Interesting suggestion- after some consideration we would rather expect that  
275 thinning of the ice would allow atmospheric temperature variability to  
276 penetrate further into the ice, hence probably more likely associated with  
277 warming than cooling. Assuming that Lorrain and Haeberli measured the  
278 temperature only in the tunnel, not deeper in the walls of the ice (like we did),  
279 the two sets of reported temperature are not straightforward to compare.  
280 As we discuss in the manuscript, we believe that the englacial temperature  
281 measured in our vertical boreholes are to some extent the result of the  
282 artificial cooling of the tunnel. Another potential effect would be changes in  
283 surface energy balance by fabric cover and snow plowing (ski resort).  
284 However, it is difficult to disentangle these anthropogenic technical measures  
285 from natural effects. Without detailed measurements of energy fluxes,  
286 including latent fluxes, and refreezing/sublimation at the tunnel walls during  
287 several years, the potential effects cannot be quantified and explanations  
288 remain uncertain.

289 The certain and important consequence in the context of our work, however,  
290 is that the ice remains frozen to bedrock thus far.

291  
292 P9 - L6 - Suggest rewording to - "...from basal temperature measurements revealing  
293 temperatures well below the pressure melting point"  
294

295 Changed accordingly.

296  
297 P10 - L6 - "karst" rather than "carst"

298  
299 Changed accordingly.

300  
301 P10 - L19/20 - Emphasise why a cold-based thermal regime is required  
302 to preserve old basal ice.

303  
304 Changed accordingly. P13, L11ff.

305  
306 P10 L19-22 - What is the source of this organic material and how has it been  
307 incorporated into the basal ice?

308  
309 This is of course important- the organic material is assumed to be of eolian  
310 origin originally deposited on the glacier surface (like the dust-type layers  
311 visible in the stratigraphy). The basal layer, which contains a substantial  
312 amount of sediment from the bed, has been avoided for 14C analysis. We have  
313 included a statement to make this clear.

314  
315  
316  
317  
318  
319  
320  
321  
322  
323  
324  
325  
326  
327  
328  
329  
330  
331  
332  
333  
334  
335  
336  
337  
338  
339  
340  
341  
342  
343  
344  
345  
346  
347  
348  
349  
350  
351  
352  
353  
354  
355  
356  
357  
358

**Changes to manuscript: P13, 17-18**

P10 - L26-28 - What is the layering composed of? Variations in bubble content and ice crystal size? Suggestion here would be that this could be foliated ice in which case it could be illustrative of shear deformation.

We have clarified this and again referred to the new table with the ice facies characteristics. Given the regular nature of the layering parallel to the bed we interpret the layering as not supporting any signs of folding or stratigraphic disturbance, at least for the situation at profiles 1 and 2.

**Changes to manuscript: Changes in section 3.4 and 4.3.**

P10 - L29 - What is meant by the use of the term "dark". Bubble free?

The term "dark" refers to the visual appearance of the layer with respect to the ambient ice. However, it is a result from larger amounts of dust in this layer, i.e. not from being bubble-free. We have clarified this in the new Table 2 and in section 3.4.

**Changes to manuscript: P7, 6-7**

P12- L6-7 - Earlier text suggested limited deformation whilst this suggests the potential for deformation - watch for possible contradictions here. Would typically expect significant shear strains in the basal ice layers of non-temperate glaciers frozen to hard rock beds.

Thank you for pointing out this possible ambiguity in reading this section, which we were not aware of. We state "that a moderate deformation is to be expected" in section 3.4 and, in this paragraph, that our findings in ice microstructure do not contradict the presence of shear deformation resulting from cold-based conditions. Having said that, in discussing the observed vertical gradient in age we are concerned with shear-introduced layer thinning, not turbulent ice flow. The latter is clearly not supported by the visual stratigraphy. We also discuss that the vertical age gradient could, as an alternative, also result from glacier growth interrupted by phases of stagnation or ablation and ultimately suggest further investigation. In this view, we do not see contradictions- however, we have reworded this section slightly to make our view more clear.

**Changes to manuscript: P15, L1 ff.**

P12 - L24-25 - Key finding - Give greater emphasis within the section.



359 Thank you for this suggestion. We have added text and elaborated on the  
360 paleoglaciological and paleoclimatological perspective on our key finding.  
361 As this work has been designed as a pilot study, final paleoclimatic  
362 interpretations will greatly benefit from a larger sample of measurements at  
363 various sites. The focus of this paper is to demonstrate the unchanged  
364 existence of the lowermost layers and their potential for drawing conclusions  
365 with the methods demonstrated applied to more locations.  
366

367 **Changes to manuscript:** P15, L18-24 and P15, L28-32.  
368

369 P13 - L5 - Suggest re-wording to: "Temperature measurements demonstrate basal  
370 temperatures that are well below the pressure melting point..."  
371

372 Changed accordingly.  
373

374 P13 - L9 - "...five ice blocks suggests a chronological order..."  
375

376 Changed accordingly.  
377

378 P13 - L14-15 - This final sentence is the key finding. Give greater emphasis (new  
379 paragraph?) and elaborate briefly on the potential palaeoclimatological and  
380 palaeoglaciological implications.  
381

382 We have restructured this into a separate paragraph to further emphasize the  
383 significance of our key finding. In our view the main message is that although  
384 one site can only provide limited direct paleoclimatic insight, we have  
385 demonstrated the potential when extending this approach to other sites with  
386 greater geographic coverage in the Alps.  
387

388 **Changes to manuscript:** P16, L15 ff.  
389

390 References Hubbard, B. & Sharp, M., 1995. Basal ice facies and their formation in the  
391 Western Alps. *Arctic & Alpine Research*, 27(4), 301-310. Knight, P.G., 1997. The  
392 basal ice layer of glaciers and ice sheets. *Quaternary Science Reviews*, 16(9), 975-  
393 993.  
394  
395
